# Supplementary material for: Actual Nurse Turnover in Iranian University Hospitals: (2021-2024)
Source: Research Square preprint supplement (doi:10.21203/rs.3.rs-8280217/v1), 2026-02-19
Supplement: Supplementary file 1 [file 7001617b233bd491d42198e1.docx]

**Semi-Structured Interview Guide**

**Purpose**

This semi-structured interview guide was designed to explore the lived experiences of nurses who left from Tehran University of Medical Sciences (TUMS) hospitals between 2021 and 2024. Guided by the principles of Interpretive Phenomenological Analysis (IPA), the interview focused on understanding individual, job-related, organizational, and external factors influencing actual nurse turnover.

**Main Open-Ended Question**

1. **What were the reasons for your departure from service as a nurse in this hospital?** *(Please describe your experience in as much detail as possible.)*

**Probing Questions**

**Individual Factors**

1. How did family responsibilities (e.g., marriage, childbearing, caregiving) influence your decision to leave?
2. Did family-related conflicts or lack of support affect your continuation in nursing?
3. How did commuting distance, traffic, or safety concerns impact your work experience?
4. Did physical or health-related problems play a role in your resignation?
5. Were plans for domestic or international migration part of your decision-making process?

**Job-Related Factors**

1. How would you describe your workload in terms of patient volume and task complexity?
2. Did emotional demands or role ambiguity affect your ability to cope with work pressures?
3. How did work schedules, overtime, and rest periods influence your physical and mental well-being?
4. To what extent did you feel you had professional autonomy and decision-making authority?
5. How would you describe the feedback, support, and behavior of your immediate supervisors or managers?

**Organizational Factors**

1. How did organizational policies and management practices affect your job satisfaction?
2. Did you feel that nurses’ needs and concerns were adequately acknowledged by leadership?
3. How fair did you perceive compensation, incentives, and workload distribution to be?
4. Did staffing shortages or workplace inequities influence your decision to resign?
5. How would you describe communication and relationships with hospital management?

**External Factors**

1. How did economic conditions such as inflation or cost of living affect your decision to leave?
2. Did environmental factors (e.g., traffic congestion, pollution) or technological limitations (e.g., outdated equipment) contribute to your dissatisfaction?

**Closing Questions**

1. Looking back, which factors do you consider most decisive in your decision to resign?
2. What changes might have encouraged you to remain in your position?

**Closing Statement**

Thank you for sharing your experiences. Your insights are valuable for understanding nurse turnover and improving workforce retention in healthcare systems.
